# Supplementary material for: Orthometallation of N-substituents at the NHC ligand of [Rh(Cl)(COD)(NHC)] complexes: its role in the catalytic hydrosilylation of ketones
Source: Royal Society of Chemistry journal article supplement (doi:10.1039/c4cy01556h), 2015-01-01
Supplement: c4cy01556h1.pdf [file c4cy01556h1.pdf]

## Supplementary Information

# Orthometallation of *N*-Substituents at the NHC Ligand of [Rh(Cl)(COD)(NHC)] Complexes: Its Role on the Catalytic Hydrosilylation of Ketones

Guillermo Lázaro<sup>a</sup>, Francisco J. Fernández-Alvarez<sup>\*a</sup>, Julen Munárriz<sup>b</sup>, Víctor Polo<sup>b</sup>,  
Manuel Iglesias<sup>a</sup>, Jesús J. Pérez-Torrente<sup>a</sup> and Luis A. Oro<sup>\*a,c</sup>

(a) Departamento de Química Inorgánica-Instituto de Síntesis Química y Catálisis Homogénea (ISQCH),  
Universidad de Zaragoza – CSIC, Facultad de Ciencias 50009, Zaragoza – Spain. E-mail: [paco@unizar.es](mailto:paco@unizar.es),  
[oro@unizar.es](mailto:oro@unizar.es).

(b) Departamento de Química Física - Instituto de Biocomputación y Física de Sistemas Complejos (BIFI)  
Universidad de Zaragoza. Pl. San Francisco S/N, 50009 Zaragoza – Spain.

(c) Visiting Professor at Center of Research Excellence in Petroleum Refining & Petrochemicals, King Fahd  
University of Petroleum & Minerals, 31261 Dhahran - Saudi Arabia.

**Reaction of C<sub>6</sub>D<sub>6</sub> solutions of 3 and excess of HSiMe(OSiMe<sub>3</sub>)<sub>2</sub> with PCy<sub>3</sub> at NMR scale.** HSiMe(OSiMe<sub>3</sub>)<sub>2</sub> (0.27 mL, 1.0 mmol), **2a** (33.4 mg, 0.05 mmol) and C<sub>6</sub>D<sub>6</sub> (0.5 mL) were placed in a NMR tube. The reaction mixture was heated at 90°C for 8 hours. After that, the solution was cooled at 25 °C and PCy<sub>3</sub> (0.05 mmol) was added to the reaction mixture. <sup>1</sup>H and <sup>31</sup>P{<sup>1</sup>H} NMR spectra were recorded after 2 hours at 25 °C. Afterwards, the mixture was heated at 70°C and monitored by <sup>1</sup>H and <sup>31</sup>P{<sup>1</sup>H} NMR spectroscopy.

**Table.** B3LYP-D3/def2-SVP total energies in gas phase and Gibbs free energies (at 298 K and 1 atm) for all calculated structures.

|        | Eel/hartree | G/hartree   | ΔG/kcal |
|--------|-------------|-------------|---------|
| A      | -1033.80156 | -1033.44936 | 0.0     |
| TSA-B  | -1443.51805 | -1443.05376 | 18.8    |
| B      | -1443.53696 | -1443.06827 | 9.6     |
| TSB-C  | -1443.52790 | -1443.06181 | 13.7    |
| C      | -1443.55524 | -1443.08736 | -2.3    |
| TSC-D  | -1443.53806 | -1443.07287 | 6.8     |
| D      | -1443.55984 | -1443.09089 | -4.5    |
| TSD-E  | -1443.52936 | -1443.06389 | 12.4    |
| E      | -1443.55052 | -1443.08780 | -2.6    |
| F      | -2261.02064 | -2260.45470 | -25.2   |
| G      | -1323.51872 | -1323.16874 | 17.2    |
| Me2CO  | -193.02324  | -192.96882  |         |
| HSiMe3 | -409.72219  | -409.63429  |         |
| COE    | -313.06728  | -312.89654  |         |

Geometrical representation of the B3LYP-D3/def2-SVP optimized structures

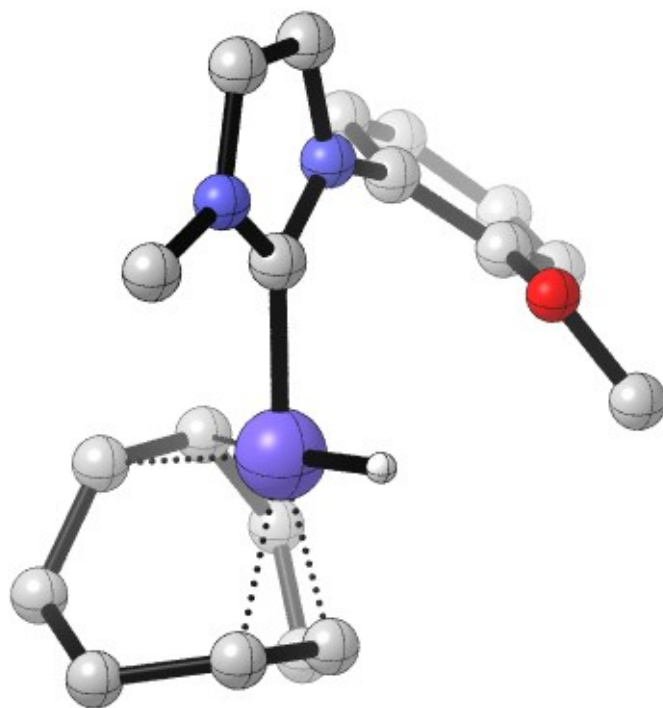

A

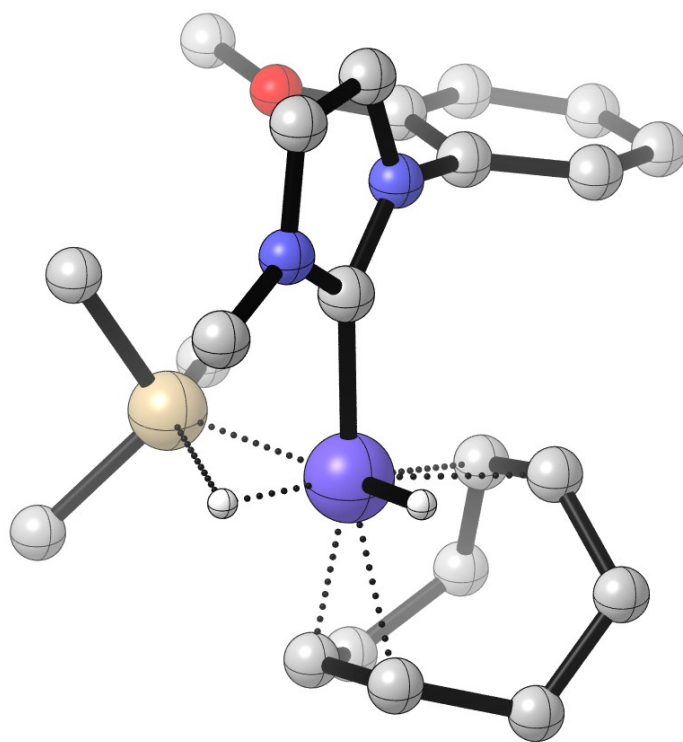

TSA-B

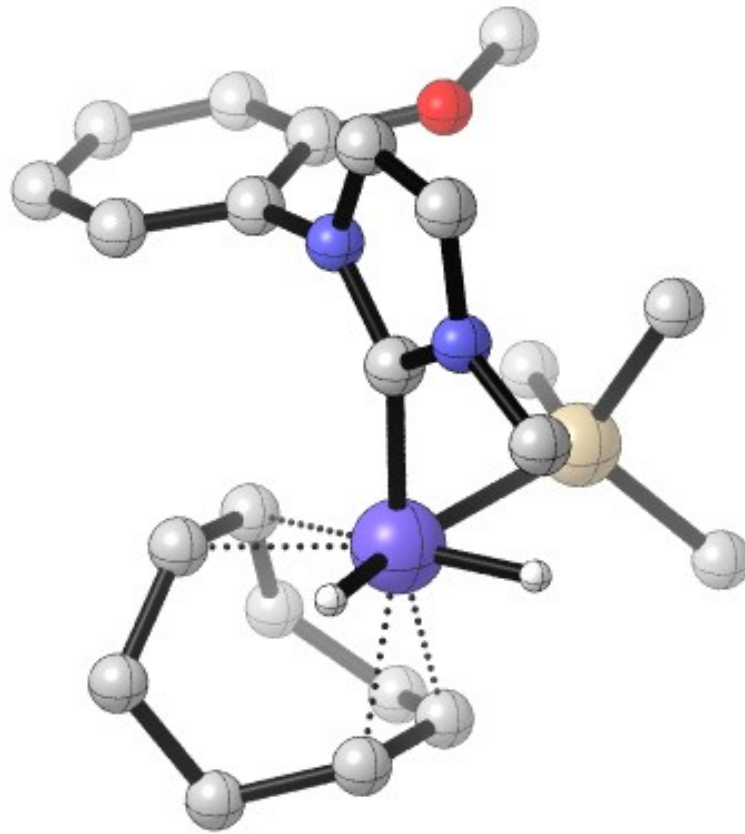

**B**

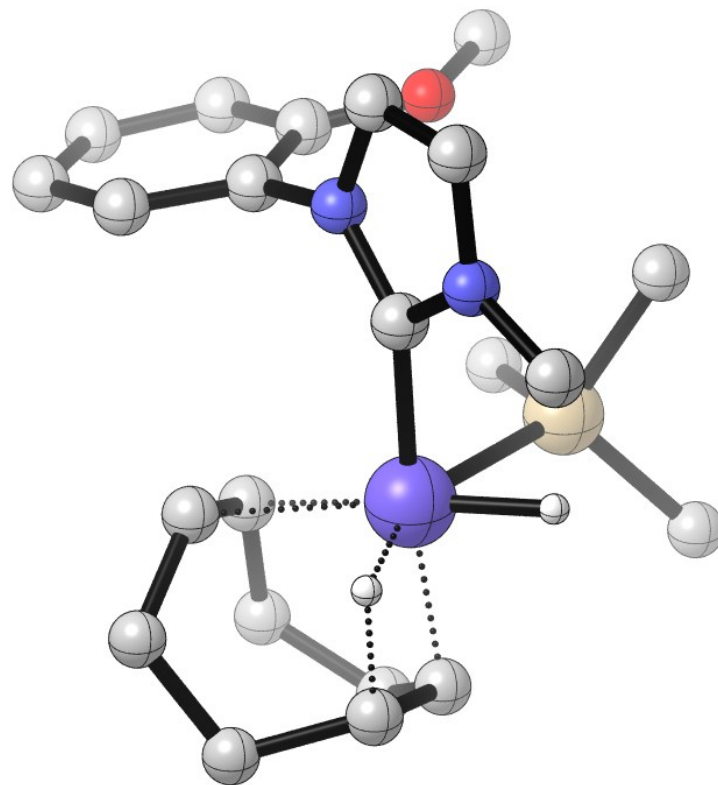

**TSB-C**

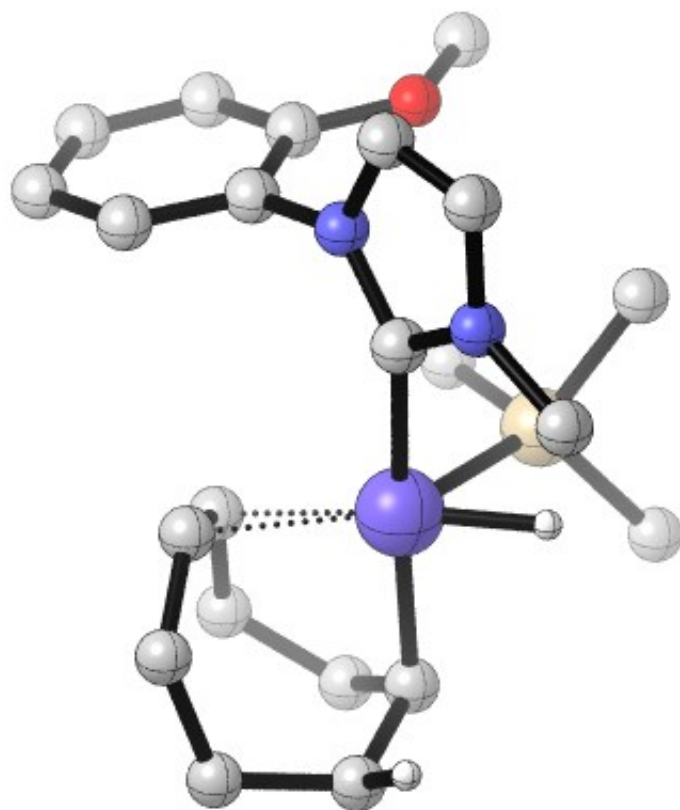

c

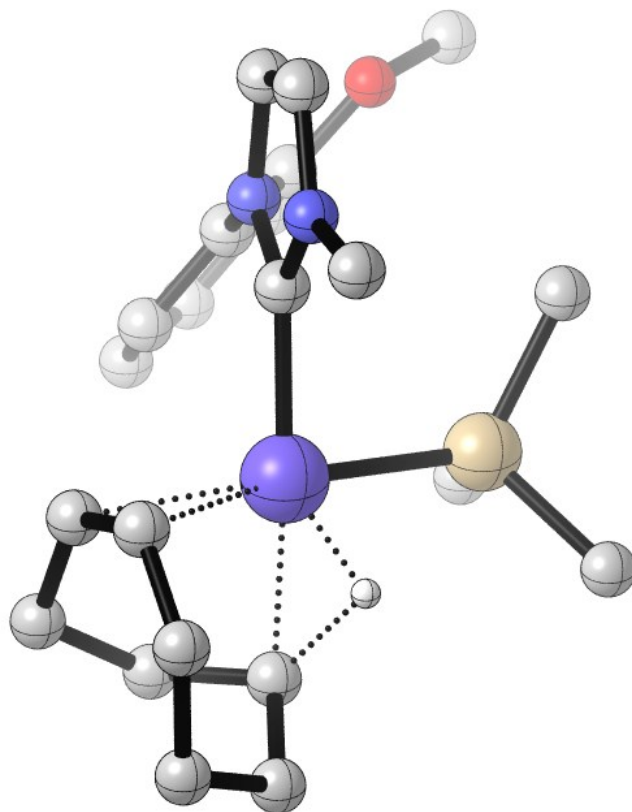

TSC-D

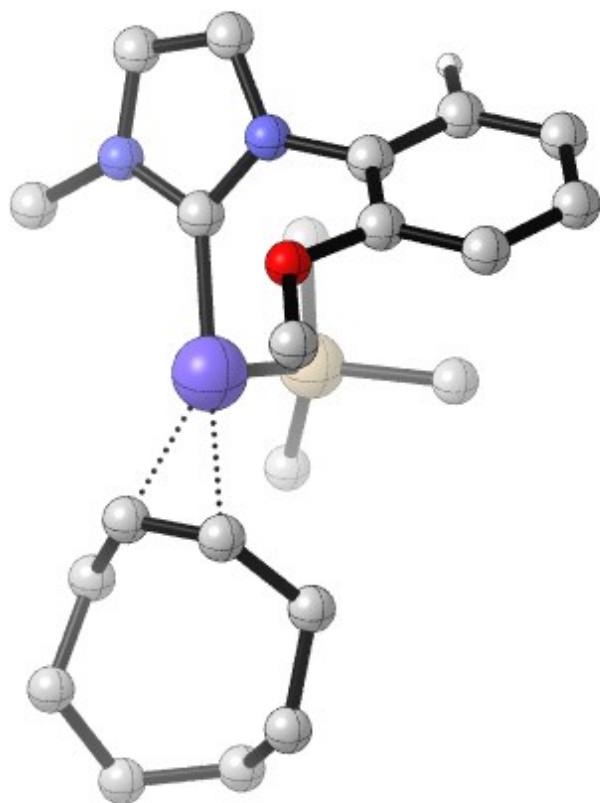

D

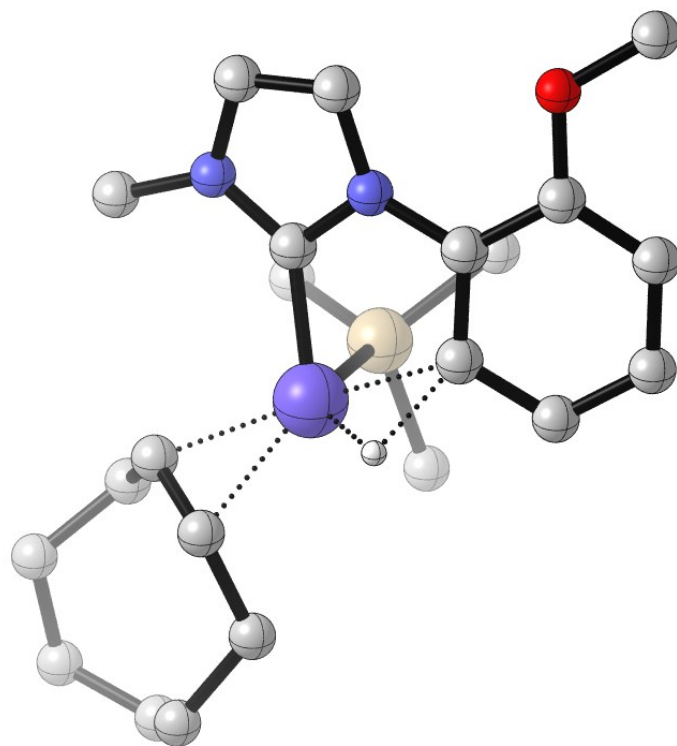

TSD-E

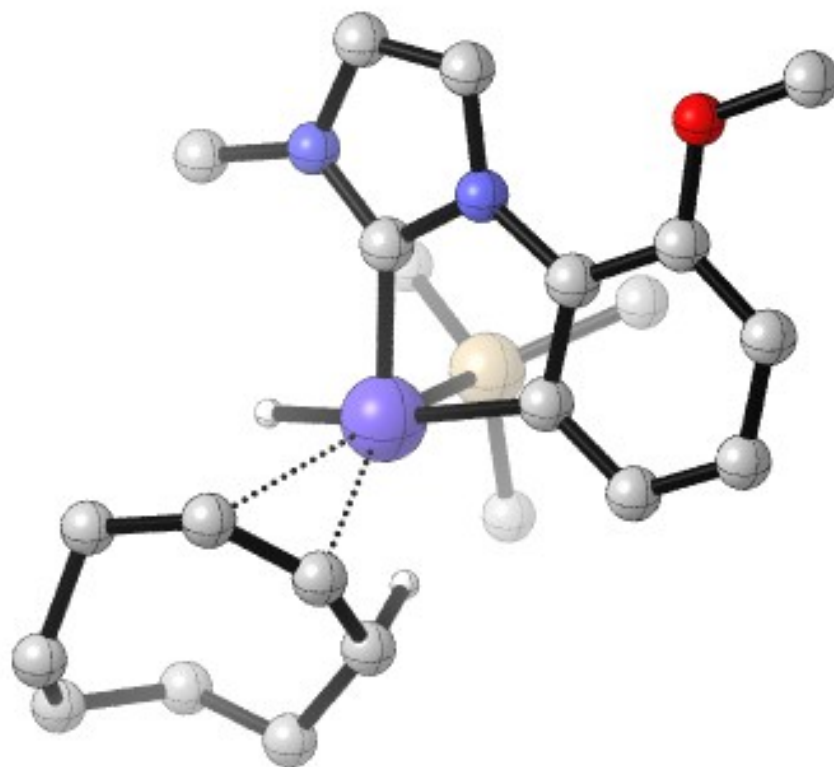

E

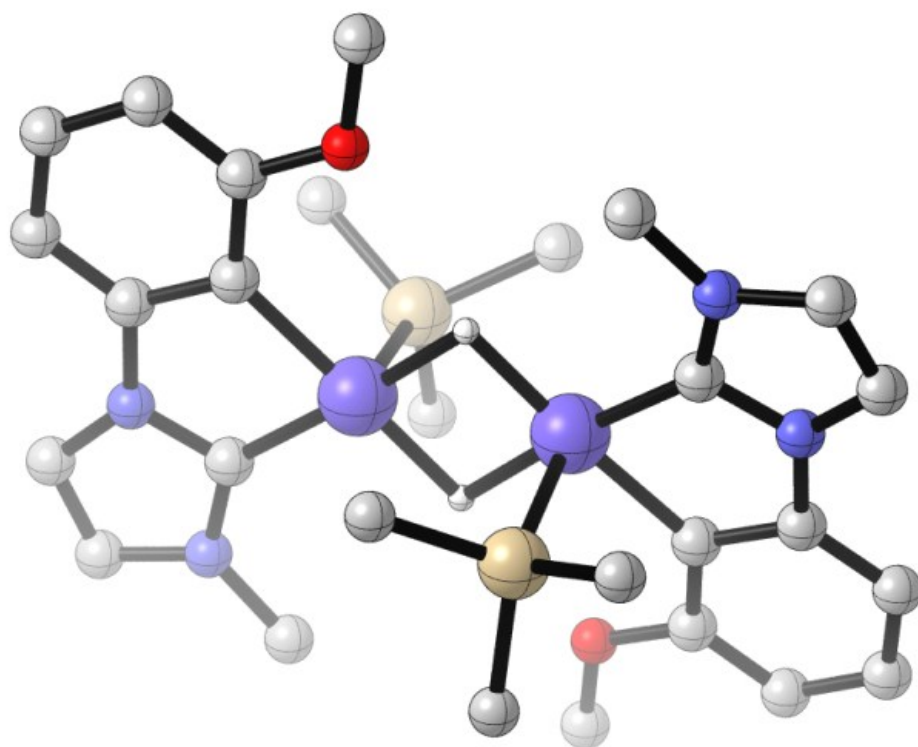

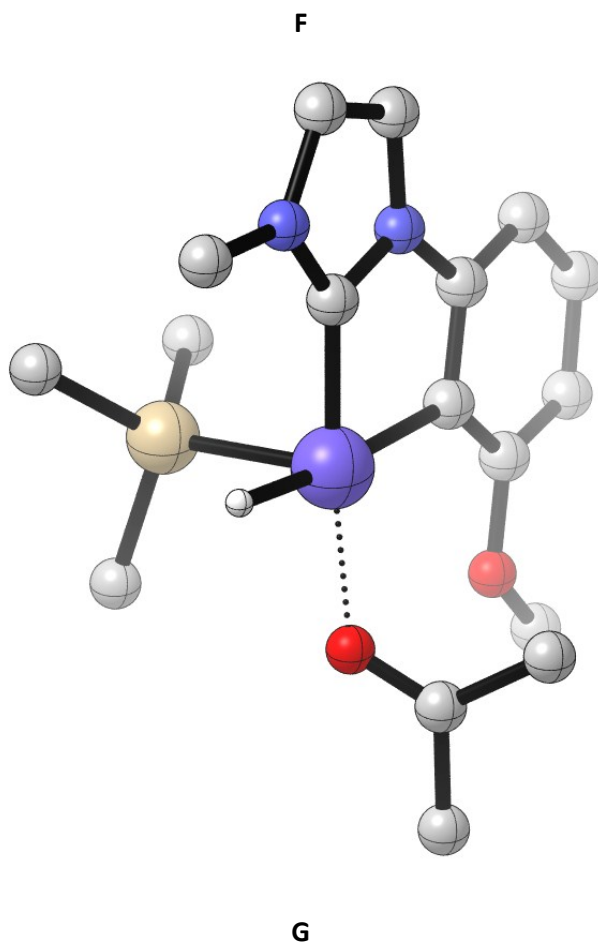

Cartesian coordinates (in Å) for all calculated structures using the B3LYP-D3/def2-SVP method

|          |           |           |           |          |           |           |           |
|----------|-----------|-----------|-----------|----------|-----------|-----------|-----------|
| <b>A</b> | 1         | -3.351320 | 0.126247  | 1.760793 |           |           |           |
| 6        | -2.192425 | -1.500893 | 1.023086  | 1        | 0.274732  | -0.737359 | -1.781899 |
| 6        | -3.054186 | -0.416899 | 0.858840  | 1        | -1.469145 | 0.825682  | -2.242256 |
| 6        | -3.922532 | -0.143834 | -0.348846 | 45       | -1.032117 | 0.271955  | 0.412002  |
| 1        | -4.869973 | -0.715743 | -0.287203 | 1        | -0.958376 | 0.831773  | 1.930161  |
| 1        | -4.210038 | 0.919672  | -0.310046 | 6        | 0.447900  | 1.607028  | 0.012649  |
| 6        | -3.226678 | -0.422699 | -1.698908 | 6        | 1.552478  | 3.571814  | -0.329663 |
| 1        | -3.363190 | -1.476309 | -1.985057 | 6        | 2.458351  | 2.574193  | -0.493841 |
| 1        | -3.729125 | 0.164482  | -2.484052 | 1        | 1.664336  | 4.650266  | -0.394947 |
| 6        | -1.745603 | -0.080636 | -1.694184 | 1        | 3.521252  | 2.595709  | -0.713425 |
| 6        | -0.722602 | -0.978586 | -1.406917 | 7        | 0.340672  | 2.965316  | -0.020975 |
| 6        | -0.885453 | -2.418922 | -0.975678 | 7        | 1.770442  | 1.380280  | -0.285749 |
| 1        | 0.067548  | -2.725937 | -0.515055 | 6        | 2.359924  | 0.089558  | -0.396648 |
| 1        | -1.021708 | -3.080229 | -1.854588 | 6        | 2.351051  | -0.780636 | 0.715971  |
| 6        | -2.030440 | -2.646449 | 0.034875  | 6        | 2.914919  | -0.321559 | -1.607614 |
| 1        | -2.978261 | -2.819149 | -0.496754 | 6        | 2.845668  | -2.083801 | 0.556004  |
| 1        | -1.831516 | -3.576041 | 0.591966  | 6        | 3.439078  | -1.609154 | -1.749831 |
| 1        | -1.851345 | -1.704898 | 2.042729  | 1        | 2.897452  | 0.371208  | -2.451577 |



6 3.385482 -2.488803 -0.667964  
1 2.825398 -2.778380 1.395454  
1 3.862412 -1.926470 -2.704474  
1 3.771255 -3.505868 -0.769777  
8 1.879135 -0.283526 1.870157  
6 -0.899480 3.678632 0.220888  
1 -1.577562 2.993749 0.748257  
1 -1.366451 3.992147 -0.726265  
6 1.440576 -1.167408 2.880610  
1 2.289392 -1.674410 3.373550  
1 0.902177 -0.553043 3.612093  
1 0.745896 -1.918092 2.470089  
1 -0.705638 4.566358 0.841037

**TSA-B**

6 -3.396693 -0.817629 0.565790  
6 -3.159433 -0.149577 -0.630310  
6 -2.887429 -0.829584 -1.957706  
1 -3.823466 -1.279883 -2.344988  
1 -2.621796 -0.044436 -2.680756  
6 -1.756637 -1.881155 -1.919440  
1 -2.189429 -2.891069 -1.808591  
1 -1.254439 -1.890010 -2.899798  
6 -0.713713 -1.642852 -0.832218  
6 -0.877996 -2.085846 0.505059  
6 -2.034938 -2.899819 1.051561  
1 -1.942811 -2.898626 2.149536  
1 -1.949326 -3.959683 0.733682  
6 -3.407318 -2.332494 0.672364  
1 -3.747468 -2.758041 -0.284969  
1 -4.156147 -2.637183 1.420504  
1 -3.919799 -0.274558 1.352693  
1 -3.540629 0.873773 -0.701594  
1 0.039068 -2.287760 1.053462  
1 0.315033 -1.560766 -1.189011  
45 -1.277843 0.027509 0.571618  
1 -1.361832 1.717492 0.060816  
6 0.472453 0.508314 1.542743  
6 1.926876 1.749757 2.808619  
6 2.661752 0.798187 2.188223  
1 2.220294 2.537459 3.495671  
1 3.723993 0.577671 2.207562  
7 0.610488 1.563152 2.415730  
7 1.773074 0.047856 1.425786  
6 2.283102 -0.958498 0.550992

6 2.843504 -0.561432 -0.682124  
6 2.342721 -2.291860 0.945774  
6 3.379107 -1.535119 -1.535592  
6 2.879235 -3.262640 0.096041  
1 1.957911 -2.559001 1.930573  
6 3.380991 -2.878192 -1.146577  
1 3.795227 -1.252360 -2.501626  
1 2.901653 -4.308856 0.405338  
1 3.795165 -3.627265 -1.825387  
8 2.836633 0.764097 -0.944844  
6 -0.447112 2.447880 2.873080  
1 -1.279993 1.858531 3.275050  
1 -0.839156 3.047838 2.040766  
6 3.480305 1.245544 -2.105665  
1 3.013662 0.850246 -3.022682  
1 3.361954 2.335978 -2.089819  
1 4.554256 0.990196 -2.102956  
1 -0.031659 3.114083 3.641532  
1 -1.940002 0.651463 1.901777  
14 -0.623930 2.196941 -1.233842  
6 0.762826 3.307431 -0.578948  
1 1.201770 3.897128 -1.402068  
1 0.383684 4.018609 0.172516  
1 1.562700 2.709027 -0.119915  
6 0.055457 1.152584 -2.655014  
1 -0.755122 0.650835 -3.200371  
1 0.578321 1.819311 -3.363802  
1 0.750881 0.384474 -2.301562  
6 -1.978989 3.292469 -1.982721  
1 -2.823858 2.682972 -2.343318  
1 -2.374192 4.006231 -1.241711  
1 -1.592926 3.868474 -2.841001

**B**

6 3.452772 -0.299344 -0.421020  
6 3.045714 -0.069709 0.897482  
6 2.753128 -1.168879 1.898030  
1 3.704224 -1.636728 2.221050  
1 2.336349 -0.698532 2.798603  
6 1.775271 -2.249920 1.396151  
1 2.337628 -3.121771 1.023463  
1 1.187471 -2.620836 2.249522  
6 0.809762 -1.794712 0.308499  
6 1.119214 -1.847917 -1.045198  
6 2.431781 -2.316221 -1.637859

1 2.423288 -2.045984 -2.703967  
1 2.489308 -3.422701 -1.596881  
6 3.676895 -1.697350 -0.981632  
1 4.043248 -2.348511 -0.171239  
1 4.490865 -1.657258 -1.721993  
1 4.003919 0.503982 -0.911581  
1 3.351637 0.878736 1.340343  
1 0.288965 -1.878541 -1.746178  
1 -0.244409 -1.785144 0.581771  
45 1.304865 0.339284 -0.444354  
1 1.725554 1.842132 -0.398280  
6 -0.442380 0.967780 -1.306355  
6 -1.855828 2.347224 -2.455777  
6 -2.586597 1.281032 -2.056692  
1 -2.136522 3.229925 -3.021926  
1 -3.633545 1.029890 -2.189501  
7 -0.560883 2.140455 -2.004287  
7 -1.716483 0.440560 -1.367284  
6 -2.205100 -0.778244 -0.806010  
6 -2.915669 -0.736869 0.413878  
6 -2.097609 -1.975418 -1.509099  
6 -3.405423 -1.932934 0.957429  
6 -2.593053 -3.165466 -0.970979  
1 -1.616138 -1.961120 -2.486997  
6 -3.227947 -3.137445 0.270336  
1 -3.928599 -1.927256 1.912700  
1 -2.481442 -4.102739 -1.518395  
1 -3.610434 -4.061233 0.710557  
8 -3.090678 0.479781 0.962558  
6 0.512383 3.078186 -2.284632  
1 1.373017 2.540635 -2.701883  
1 0.837582 3.583538 -1.365405  
6 -3.822005 0.612859 2.163577  
1 -3.355647 0.046311 2.984930  
1 -3.801916 1.680814 2.413285  
1 -4.867294 0.281870 2.033680  
1 0.142506 3.822126 -3.002907  
1 1.809819 0.426736 -1.997668  
14 0.405721 1.330850 1.631497  
6 -0.847445 2.736649 1.283774  
1 -1.225904 3.147494 2.236645  
1 -0.349792 3.562201 0.747660  
1 -1.710125 2.410880 0.688142  
6 -0.454788 0.139427 2.866506  
1 0.294162 -0.459121 3.408312

1 -1.026258 0.708399 3.620708  
1 -1.135624 -0.567683 2.372968  
6 1.672744 2.247123 2.739531  
1 1.137643 2.783272 3.542875  
1 2.400511 1.577611 3.224385  
1 2.238993 2.994482 2.159068

**TSB-C**

6 3.440208 0.201860 0.591160  
6 3.074672 -0.014607 -0.780299  
6 2.938763 1.092215 -1.813613  
1 3.932987 1.513327 -2.067392  
1 2.576328 0.619948 -2.737878  
6 1.966877 2.224568 -1.430317  
1 2.526745 3.080672 -1.017507  
1 1.478006 2.604043 -2.340582  
6 0.894655 1.822916 -0.427739  
6 1.112195 1.864974 0.938661  
6 2.394121 2.298859 1.623730  
1 2.279669 2.074577 2.695202  
1 2.497903 3.399418 1.550578  
6 3.676653 1.615971 1.120134  
1 4.147748 2.211856 0.321770  
1 4.408698 1.579924 1.941742  
1 4.094450 -0.561540 1.020698  
1 3.449521 -0.948392 -1.206678  
1 0.239917 1.910735 1.583280  
1 -0.138479 1.832460 -0.775999  
45 1.262751 -0.350707 0.337020  
1 1.566014 -1.882075 0.229879  
6 -0.432393 -0.889227 1.382685  
6 -1.811600 -2.230028 2.623428  
6 -2.563473 -1.194810 2.181492  
1 -2.072329 -3.087008 3.237108  
1 -3.611940 -0.952183 2.319671  
7 -0.525403 -2.024393 2.143731  
7 -1.714844 -0.377927 1.438563  
6 -2.215276 0.807310 0.818967  
6 -2.934792 0.703351 -0.392036  
6 -2.101664 2.041958 1.453912  
6 -3.431989 1.868997 -0.992850  
6 -2.603568 3.202132 0.859128  
1 -1.612877 2.080519 2.427818  
6 -3.251193 3.108251 -0.372304

1 -3.962919 1.812071 -1.942134  
1 -2.487989 4.166854 1.355784  
1 -3.639889 4.006953 -0.856832  
8 -3.112944 -0.539087 -0.876808  
6 0.569057 -2.935283 2.424830  
1 1.467871 -2.361019 2.681030  
1 0.798126 -3.554616 1.545951  
6 -3.844771 -0.733513 -2.069136  
1 -3.377247 -0.211462 -2.918772  
1 -3.826492 -1.812969 -2.262657  
1 -4.889516 -0.394367 -1.956885  
1 0.281484 -3.581233 3.265788  
1 2.281500 -0.319532 1.661860  
14 0.335076 -1.340827 -1.667739  
6 -0.908518 -2.747736 -1.301100  
1 -1.362625 -3.124459 -2.234955  
1 -0.371962 -3.591329 -0.834167  
1 -1.717208 -2.440485 -0.625242  
6 -0.495999 -0.120086 -2.890948  
1 0.274029 0.515705 -3.357660  
1 -1.011140 -0.662128 -3.703757  
1 -1.217185 0.553252 -2.407008  
6 1.607197 -2.236876 -2.783203  
1 1.088466 -2.732537 -3.622806  
1 2.356516 -1.556471 -3.217563  
1 2.149235 -3.013349 -2.218344

**C**

6 4.010244 -0.220648 -0.460609  
6 3.025017 0.099165 0.677331  
6 2.980406 -0.970733 1.772775  
1 3.997240 -1.304821 2.068325  
1 2.546174 -0.515775 2.675692  
6 2.115282 -2.189087 1.388092  
1 2.744668 -3.016351 1.023469  
1 1.601807 -2.580486 2.280122  
6 1.062235 -1.875840 0.337337  
6 1.257256 -1.772044 -1.024613  
6 2.540156 -1.852504 -1.826609  
1 2.447136 -1.140906 -2.670087  
1 2.567529 -2.849829 -2.309154  
6 3.877473 -1.596114 -1.125863  
1 4.076939 -2.387047 -0.387474  
1 4.672517 -1.700715 -1.884396

1 5.047153 -0.139676 -0.072498  
1 3.383164 1.032970 1.135140  
1 0.370756 -1.876636 -1.648790  
1 0.023194 -1.999504 0.654257  
45 1.164607 0.372305 -0.267402  
1 1.395600 1.925182 -0.044163  
6 -0.571575 0.819633 -1.414071  
6 -1.962672 2.090213 -2.713867  
6 -2.701927 1.058597 -2.235518  
1 -2.233155 2.916208 -3.365405  
1 -3.745328 0.793764 -2.373786  
7 -0.677207 1.920054 -2.218685  
7 -1.839792 0.286134 -1.462765  
6 -2.281470 -0.893134 -0.790872  
6 -2.997678 -0.769528 0.419340  
6 -2.070336 -2.150467 -1.350766  
6 -3.419615 -1.930102 1.083368  
6 -2.493383 -3.306603 -0.689793  
1 -1.566349 -2.210889 -2.315638  
6 -3.155730 -3.187184 0.531605  
1 -3.950803 -1.857386 2.031435  
1 -2.304397 -4.288206 -1.127285  
1 -3.485265 -4.081406 1.065625  
8 -3.234570 0.485579 0.847665  
6 0.402420 2.860334 -2.466421  
1 1.353418 2.319773 -2.531686  
1 0.478561 3.590639 -1.647243  
6 -3.912189 0.693593 2.069519  
1 -3.373776 0.229626 2.911309  
1 -3.940651 1.779709 2.220225  
1 -4.942801 0.299600 2.029519  
1 0.211504 3.386568 -3.412210  
14 0.343051 1.435561 1.621380  
6 -0.988201 2.750518 1.256148  
1 -1.459330 3.087748 2.196263  
1 -0.524959 3.632301 0.782986  
1 -1.778691 2.374477 0.593366  
6 -0.445662 0.114311 2.757092  
1 0.335192 -0.518589 3.205479  
1 -0.991093 0.605763 3.582404  
1 -1.138514 -0.547415 2.220951  
6 1.574811 2.342164 2.754969  
1 1.038578 2.754076 3.627780  
1 2.369043 1.681223 3.132945  
1 2.058568 3.179572 2.226734

1 3.932710 0.559680 -1.243054

**TSC-D**

6 4.005233 0.966907 -0.991528  
6 2.531102 1.318683 -0.754854  
6 2.316803 2.332241 0.377069  
1 2.973718 3.211997 0.214429  
1 1.283696 2.708342 0.310675  
6 2.554173 1.776548 1.801390  
1 3.612318 1.882771 2.084855  
1 1.995256 2.394078 2.522469  
6 2.101237 0.335178 1.947522  
6 2.700070 -0.797758 1.424647  
6 4.038774 -0.967538 0.740767  
1 3.921210 -1.729591 -0.050780  
1 4.720844 -1.427811 1.482656  
6 4.738569 0.263435 0.159015  
1 4.950539 0.979663 0.965953  
1 5.728895 -0.056455 -0.207866  
1 4.561287 1.894196 -1.230010  
1 2.157376 1.780899 -1.680294  
1 2.314497 -1.746204 1.813255  
1 1.325969 0.152537 2.698574  
45 1.050792 -0.162183 -0.061597  
1 2.096817 -0.181134 -1.199352  
6 -0.463447 -1.321376 0.681748  
6 -1.694106 -3.119601 1.348785  
6 -2.464020 -2.021000 1.546305  
1 -1.899992 -4.170857 1.528025  
1 -3.474917 -1.913493 1.920896  
7 -0.483779 -2.675579 0.824639  
7 -1.702609 -0.927115 1.137646  
6 -2.150251 0.420820 1.086182  
6 -3.401565 0.732947 0.508944  
6 -1.314709 1.448217 1.523195  
6 -3.785292 2.075058 0.393100  
6 -1.695938 2.785476 1.393462  
1 -0.354640 1.183457 1.960205  
6 -2.932923 3.093361 0.830999  
1 -4.742314 2.332530 -0.058583  
1 -1.023613 3.576344 1.730261  
1 -3.245018 4.134178 0.720829  
8 -4.152779 -0.310388 0.078325

6 0.590742 -3.547284 0.389200  
1 1.112090 -3.997554 1.248494  
1 1.294330 -2.933528 -0.189966  
6 -5.292622 -0.058634 -0.715904  
1 -5.033167 0.529378 -1.612731  
1 -5.675784 -1.039261 -1.025720  
1 -6.076743 0.472237 -0.148126  
1 0.189002 -4.348985 -0.248445  
14 -0.164047 -0.131975 -2.105779  
6 -1.601134 -1.379562 -2.298219  
1 -2.070636 -1.281694 -3.292996  
1 -1.238728 -2.417091 -2.202744  
1 -2.383239 -1.232153 -1.537912  
6 -0.943765 1.601187 -2.319832  
1 -0.167309 2.383744 -2.318665  
1 -1.489670 1.670169 -3.277901  
1 -1.647403 1.835288 -1.507330  
6 0.895535 -0.397943 -3.675534  
1 0.288445 -0.288178 -4.591630  
1 1.722768 0.329174 -3.731518  
1 1.341671 -1.406537 -3.685474  
1 4.075609 0.331234 -1.892136

**D**

45 -0.273949 0.369415 0.516158  
6 1.503747 1.319347 0.549211  
6 3.083474 2.936064 0.844347  
6 3.744792 1.773184 0.611982  
1 3.456703 3.936239 1.044647  
1 4.805302 1.544834 0.573772  
7 1.726597 2.641713 0.803885  
7 2.769755 0.792563 0.440353  
6 3.044792 -0.546549 0.049757  
6 2.530959 -1.628430 0.799309  
6 3.811185 -0.785012 -1.090450  
6 2.770239 -2.933895 0.348804  
6 4.070067 -2.089398 -1.517828  
1 4.177201 0.070672 -1.660638  
6 3.535441 -3.157758 -0.799595  
1 2.367814 -3.783765 0.898138  
1 4.661832 -2.263356 -2.418063  
1 3.709343 -4.183951 -1.130978  
8 1.848169 -1.327104 1.925107  
6 0.666266 3.619910 0.958776  
1 0.663902 4.036831 1.978039

1 -0.282755 3.095788 0.771991  
6 1.172871 -2.357440 2.614931  
1 1.878598 -3.096071 3.033937  
1 0.629301 -1.873516 3.436183  
1 0.450563 -2.869781 1.958179  
1 0.791552 4.437217 0.232097  
14 -0.183754 0.634251 -1.764438  
6 1.070915 1.916063 -2.436775  
1 1.032759 1.945728 -3.539714  
1 0.847720 2.930991 -2.068313  
1 2.105353 1.676605 -2.143822  
6 0.336317 -1.030965 -2.543609  
1 -0.397272 -1.820894 -2.321331  
1 0.411160 -0.932767 -3.641754  
1 1.312374 -1.366961 -2.164418  
6 -1.801156 1.132702 -2.651707  
1 -1.595017 1.216147 -3.733341  
1 -2.608120 0.395461 -2.527277  
1 -2.175309 2.108017 -2.302867  
6 -5.685447 -0.150008 0.113750  
6 -5.015117 -1.228859 -0.752540  
6 -2.310343 0.385087 1.121429  
6 -4.028858 -2.212754 -0.087330  
6 -1.968271 -0.955627 0.878463  
6 -2.533705 -1.825785 -0.222338  
1 -6.466268 -0.623567 0.735416  
1 -4.497707 -0.746367 -1.599164  
1 -4.287379 -2.367077 0.975303  
1 -6.226619 0.522367 -0.575812  
1 -5.832389 -1.807551 -1.215542  
1 -4.161104 -3.194488 -0.572119  
1 -1.929059 -2.746900 -0.260815  
1 -2.397913 -1.350051 -1.203806  
6 -4.796045 0.697959 1.039119  
1 -4.602548 0.134798 1.967316  
1 -5.378811 1.581400 1.349789  
6 -3.430765 1.135493 0.445211  
1 -3.415067 0.967834 -0.637416  
1 -3.277382 2.217377 0.585723  
1 -1.611366 -1.529970 1.746545  
1 -2.147098 0.732478 2.157098

**TSD-E**

45 0.365238 -0.192534 -0.510029

6 -0.876667 1.311563 -0.384575  
6 -2.078050 3.193972 -0.761948  
6 -2.949709 2.152395 -0.833567  
1 -2.244900 4.261184 -0.875892  
1 -4.013424 2.117903 -1.025550  
7 -0.819067 2.672324 -0.477397  
7 -2.207903 1.000128 -0.596717  
6 -2.559188 -0.367120 -0.558417  
6 -3.884165 -0.815738 -0.383672  
6 -1.454638 -1.249984 -0.511705  
6 -4.114119 -2.173320 -0.140300  
6 -1.724551 -2.607535 -0.246736  
1 -0.156374 -1.388494 -1.493707  
6 -3.027823 -3.055374 -0.055462  
1 -5.127185 -2.548069 -0.003498  
1 -0.895528 -3.317445 -0.204265  
1 -3.217651 -4.113097 0.144269  
8 -4.871043 0.125562 -0.423501  
6 0.381043 3.469371 -0.330737  
1 0.845887 3.673307 -1.308547  
1 1.095615 2.921814 0.290487  
6 -6.198781 -0.263970 -0.154329  
1 -6.295256 -0.712165 0.850098  
1 -6.808352 0.648364 -0.200989  
1 -6.573218 -0.984370 -0.902839  
1 0.130800 4.423295 0.154572  
14 0.072450 0.032377 1.834481  
6 0.704233 1.585772 2.730718  
1 0.637234 1.422595 3.820493  
1 1.747752 1.832723 2.492955  
1 0.075923 2.458330 2.490363  
6 -1.683080 -0.200452 2.519126  
1 -2.123684 -1.162564 2.221943  
1 -1.636835 -0.167086 3.621430  
1 -2.362161 0.600943 2.188894  
6 1.098387 -1.454723 2.434414  
1 0.984847 -1.557274 3.528152  
1 0.747982 -2.388783 1.968363  
1 2.170524 -1.341075 2.214949  
6 5.755646 0.042407 0.186377  
6 5.247811 -1.404554 0.089464  
6 2.344340 0.751126 -0.784816  
6 4.496478 -1.820697 -1.191562  
6 2.284006 -0.458242 -1.517266  
6 2.948517 -1.761996 -1.101976

1 6.661390 0.148370 -0.436887  
1 4.599252 -1.626997 0.954546  
1 4.847341 -1.235491 -2.059663  
1 6.090632 0.207837 1.226086  
1 6.125001 -2.060759 0.218566  
1 4.765042 -2.867148 -1.411268  
1 2.530351 -2.553806 -1.742691  
1 2.663939 -2.039846 -0.073539  
6 4.774799 1.153347 -0.212787  
1 4.719424 1.205496 -1.312344  
1 5.204266 2.118165 0.106004  
6 3.332025 0.998537 0.336430  
1 3.293867 0.191897 1.082600  
1 3.045924 1.911841 0.879380  
1 2.102178 -0.378484 -2.594324  
1 2.177435 1.649243 -1.392838

#### E

45 -0.579132 0.058583 -0.049456  
6 0.762296 1.279504 0.611710  
6 2.068467 2.911517 1.461861  
6 2.856692 1.811158 1.307290  
1 2.303439 3.902769 1.837739  
1 3.904266 1.640120 1.515057  
7 0.788678 2.572153 1.033312  
7 2.042960 0.814557 0.787252  
6 2.275931 -0.548141 0.442921  
6 3.544361 -1.151626 0.487361  
6 1.114891 -1.217539 0.008960  
6 3.659145 -2.491317 0.089998  
6 1.273621 -2.557295 -0.378594  
6 2.522325 -3.183807 -0.339666  
1 4.624622 -2.994738 0.110550  
1 0.411936 -3.132343 -0.732426  
1 2.624844 -4.227528 -0.650505  
8 4.600515 -0.392422 0.909440  
6 -0.353614 3.465209 1.074947  
1 -0.622940 3.694372 2.117886  
1 -1.190951 2.953662 0.584481  
6 5.887127 -0.965626 0.931081  
1 6.204137 -1.295945 -0.073908  
1 6.573585 -0.183925 1.283634  
1 5.940249 -1.827288 1.620082  
1 -0.123786 4.401042 0.544822  
14 0.013794 0.885164 -2.152584

6 1.798115 0.517398 -2.687529  
1 1.968264 0.897015 -3.710148  
1 2.526811 1.005696 -2.021256  
1 2.009189 -0.562305 -2.674911  
6 -1.133241 0.027515 -3.409397  
1 -2.192714 0.235912 -3.191308  
1 -0.917217 0.386731 -4.430668  
1 -0.986559 -1.064751 -3.400575  
6 -0.204604 2.759156 -2.380053  
1 -0.000409 3.039881 -3.427796  
1 -1.227218 3.079457 -2.128080  
1 0.498893 3.321416 -1.745228  
6 -5.362730 -0.274000 0.610336  
6 -4.444964 -0.478217 -0.598856  
6 -2.142819 -0.686591 2.060555  
6 -3.726699 -1.836769 -0.655384  
6 -1.757507 -1.603347 1.126344  
6 -2.231957 -1.843460 -0.286722  
1 -6.242844 -0.936051 0.522426  
1 -3.687332 0.322597 -0.634430  
1 -4.243133 -2.578731 -0.022869  
1 -5.755256 0.757684 0.572610  
1 -5.051675 -0.352653 -1.510306  
1 -3.785050 -2.229231 -1.682953  
1 -1.800159 -2.801930 -0.608715  
1 -1.753807 -1.116166 -1.030789  
6 -4.708459 -0.505655 1.977028  
1 -4.564033 -1.584492 2.151779  
1 -5.411091 -0.170422 2.757560  
6 -3.352821 0.221903 2.149816  
1 -3.278656 1.038622 1.419830  
1 -3.319602 0.701504 3.139455  
1 -0.958369 -2.279291 1.437499  
1 -1.551949 -0.735999 2.982340  
1 -1.744576 1.199367 -0.202671

#### F

45 1.258382 0.316383 -0.153049  
1 -0.260409 1.256676 -0.037603  
1 0.231167 -1.095732 0.087074  
45 -1.291455 -0.162611 0.185640  
6 3.043087 -0.676531 -0.378770  
6 3.269020 -2.062063 -0.492310  
6 4.187799 0.138897 -0.460099

6 4.570177 -2.578599 -0.636678  
6 5.492822 -0.334613 -0.608941  
6 5.670183 -1.715616 -0.690243  
1 4.741589 -3.652075 -0.710696  
1 6.346652 0.343337 -0.664124  
1 6.674081 -2.131169 -0.802793  
6 2.545332 1.827718 -0.256573  
6 3.788191 3.712654 -0.193818  
6 4.652204 2.665331 -0.332632  
1 3.975530 4.780304 -0.125766  
1 5.734808 2.648888 -0.405767  
7 3.872021 1.524071 -0.373276  
7 2.501908 3.179821 -0.151940  
6 1.281140 3.944229 0.032863  
1 0.432770 3.248414 -0.010139  
1 1.287949 4.445550 1.013090  
1 1.181529 4.702378 -0.758785  
14 1.484898 0.116163 2.130958  
14 -1.377279 -0.536029 -2.088452  
6 -3.063971 -0.146471 -2.858483  
1 -3.858268 -0.758744 -2.403672  
1 -3.336729 0.909266 -2.712022  
1 -3.043854 -0.358065 -3.941829  
6 -0.076410 0.540998 -2.959958  
1 -0.303173 1.609627 -2.831610  
1 0.942534 0.358618 -2.562024  
1 -0.038143 0.311765 -4.039580  
6 -0.964792 -2.340531 -2.511102  
1 -0.924451 -2.472191 -3.606387  
1 0.013554 -2.616149 -2.088736  
1 -1.727220 -3.032145 -2.118942  
6 2.874325 1.205522 2.832709  
1 2.930865 1.089997 3.928802  
1 3.849518 0.918230 2.409987  
1 2.709114 2.272149 2.612884  
6 1.844590 -1.657873 2.692919  
1 1.853377 -1.709197 3.795627  
1 1.080889 -2.352774 2.315075  
1 2.823642 -1.996282 2.322203  
6 -0.131496 0.662756 2.973233  
1 -1.009068 0.100549 2.594810  
1 -0.087966 0.486266 4.062641  
1 -0.331357 1.730576 2.798758  
6 -2.557924 -1.662413 0.500253  
6 -3.093561 0.825446 0.229692

6 -4.223846 0.016225 0.449236  
6 -3.354640 2.194633 0.028735  
6 -5.540371 0.478033 0.492690  
6 -4.668056 2.699987 0.066777  
6 -5.748777 1.843159 0.299780  
1 -6.380478 -0.197088 0.666314  
1 -4.864443 3.760689 -0.086594  
1 -6.762058 2.250289 0.326089  
6 -4.641158 -2.491366 0.847038  
6 -3.759531 -3.531571 0.909570  
7 -2.488053 -3.004232 0.696991  
6 -1.251486 -3.765496 0.708939  
1 -0.429580 -3.085759 0.451777  
1 -1.072158 -4.191730 1.707892  
1 -1.297686 -4.578993 -0.030095  
7 -3.885983 -1.359191 0.599940  
1 -5.720364 -2.473500 0.959557  
1 -3.925184 -4.590362 1.086124  
8 2.164208 -2.869409 -0.450964  
8 -2.275135 2.998646 -0.222702  
6 -2.488283 4.358922 -0.494889  
1 -3.132689 4.509692 -1.380395  
1 -2.941470 4.891075 0.362001  
1 -1.502224 4.797812 -0.700266  
6 2.334213 -4.261612 -0.516123  
1 2.817576 -4.578596 -1.458086  
1 2.929582 -4.645693 0.332446  
1 1.329352 -4.703276 -0.474440

## G

45 0.185913 -0.802004 -0.520843  
6 1.834155 0.204745 -0.699576  
6 -0.519428 1.191105 -0.108475  
6 0.524681 2.131791 -0.145613  
6 -1.766305 1.711867 0.281235  
6 0.397166 3.489184 0.161811  
6 -1.949805 3.070952 0.596775  
6 -0.864865 3.951160 0.533159  
1 1.247946 4.172452 0.126806  
1 -2.924205 3.458791 0.893410  
1 -1.009956 5.005097 0.781470  
6 3.024603 2.140894 -0.693766  
6 3.872881 1.129731 -1.034146  
7 3.130938 -0.047006 -1.036638  
6 3.666272 -1.350067 -1.386323

1 2.852484 -2.078393 -1.283114  
1 4.029533 -1.345287 -2.425707  
1 4.494219 -1.618169 -0.713502  
7 1.784850 1.561297 -0.497802  
1 3.204618 3.205193 -0.585587  
1 4.931351 1.144333 -1.276774  
8 -2.807467 0.810683 0.345969  
6 -4.048581 1.236602 0.844197  
1 -3.965390 1.648679 1.866158  
1 -4.521228 2.000476 0.198332  
1 -4.699347 0.351166 0.877299  
14 0.841021 -1.318855 1.617779  
6 2.521940 -2.184462 1.794897  
1 2.686886 -2.457907 2.851799  
1 2.574554 -3.100597 1.187528  
1 3.346841 -1.519225 1.494384  
6 -0.492613 -2.451180 2.345026  
1 -0.573050 -3.388305 1.774050  
1 -0.244588 -2.694247 3.393165  
1 -1.474474 -1.955037 2.322449  
6 0.951786 0.228322 2.713645  
1 1.717703 0.928695 2.344757  
1 -0.005968 0.768699 2.740465  
1 1.223514 -0.060182 3.744522  
1 0.872777 -2.248804 -0.831413  
8 -1.722288 -1.774005 -0.440319  
6 -2.655407 -1.571590 -1.207934  
6 -3.987509 -2.216849 -0.954348  
1 -4.750966 -1.432043 -0.825282  
1 -4.293327 -2.818029 -1.826850  
1 -3.943718 -2.847174 -0.057451  
6 -2.483726 -0.705991 -2.423378  
1 -1.918765 -1.278032 -3.179746  
1 -3.440868 -0.393258 -2.862564  
1 -1.880879 0.174515 -2.146811
